# Supplementary material for: Anaerobic Digestion of Cereal Rye Cover Crop
Source: MDPI journal article supplement (doi:10.3390/fermentation8110617), 2022-11-09
Supplement: s1 [file s1]

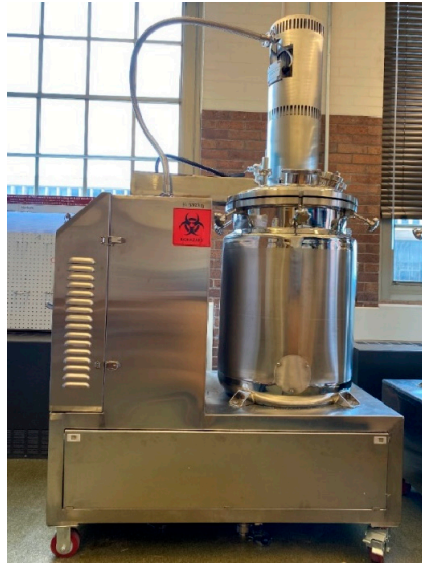

**Figure S1.** The pilot-scale anaerobic digester.

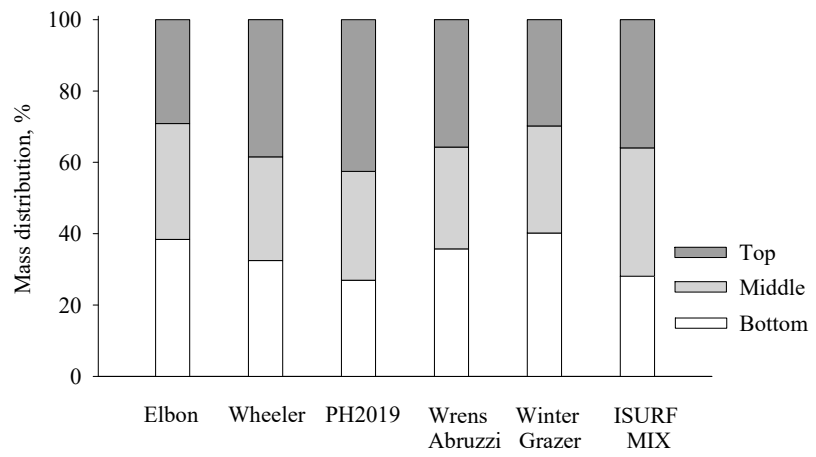

**Figure S2.** Dry matter distribution of the top, middle, and bottom sections of the cereal rye.

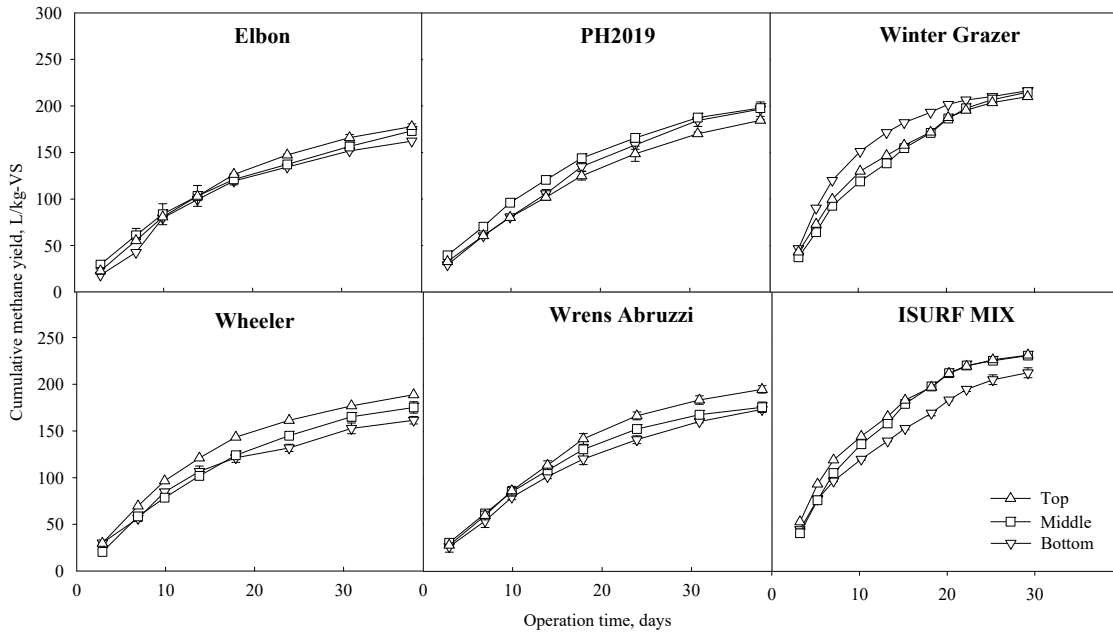

Figure S3. Cereal rye methane yields over time.
